1     **FUNGI DIVERSITY IN THE RHIZOSPHERE OF *Aspilia pruliseta* Schweif. ext Schweif**  
2                                   **IN THE SEMI-ARID EASTERN KENYA**

3             Muchoka, James Peter<sup>1</sup>, Mugendi, Daniel Njiru<sup>1</sup>, Njiruh, Paul Nthakanio<sup>1</sup>, Mbugua, Paul  
4     Kamau<sup>2</sup>, Ezekiel Mugendi Njeru<sup>3</sup>, Amanuel Menghs Ghilamical<sup>4</sup> and Mariciano Iguna Mutiga<sup>5</sup>.

5     <sup>1</sup> Department of Agricultural Resource Management, School of Agriculture, University of  
6     EMBU, P.O BOX 6-60100, EMBU, KENYA

7     <sup>2</sup> Department of Plant Sciences, School of Pure and Applied Sciences, Kenyatta University, P.O  
8     BOX 43844-00100, NAIROBI, KENYA

9     <sup>3</sup> Department of Biochemistry, Microbiology and Biotechnology, School of Pure and Applied  
10    Sciences, Kenyatta University, P.O BOX 43844-00100, NAIROBI, KENYA

11    <sup>4</sup>Institute for Biotechnology Research, Jomo Kenyatta University of Agriculture and Technology  
12    P. O. Box 62000-00200, NAIROBI, KENYA.

13  
14    <sup>5</sup>Department of Biological Sciences, School of Pure and Applied Sciences, Chuka University,  
15    P.O BOX 109-60400, CHUKA, KENYA

16    Corresponding author; Muchoka James Peter, Email: [muchojame@yahoo.com](mailto:muchojame@yahoo.com), Tel. (+254 720  
17    771639/+254 739752116)

18    \*These authors contributed equally to this work.

19  
20  
21  
22  
23  
24  
25  
26  
27  
28

29  
30  
31  
32  
33  
34  
35  
36  
37  
38  
39  
40  
41  
42  
43  
44  
45  
46  
47  
48  
49  
50  
51  
52

## Abstract

Semi-arid eastern Kenya is a fragile ecosystem with continuous cultivation of dryland pulses and grains. Farmers use artificial fertilizers most of which are deleterious to the environment. Previous studies have shown that soil microbes in the rhizosphere could be used to sustainably enhance levels of soil mineral nutrients and soil health. However, few studies have examined fungal diversity in the rhizosphere of wild and native *Aspilia pruliseta* shrub. In this study, amplicons of Internal Transcribed Spacer (ITS) region on Total Community DNA using Illumina sequencing were used to explore the fungal community composition within the rhizosphere. Operational taxonomic units (OTUs) were analyzed using QIIME 1.8.0, taxonomy assigned via BLASTn against SILVA 119 database. Hierarchical clustering was done using R programming software. 72,093, 50,539 and 43,506 sequence reads were obtained from samples MC1<sub>a</sub>, MC2<sub>a</sub> and MC3<sub>a</sub> respectively representing rhizosphere depth 0-20 cm, 21-40 cm and 41-60 cm. A total of 373 OTUs were realized at 3% genetic distance. Taxonomic analysis revealed that the genera *Glomus* was most prevalent in all soil depths with 85.60 % of the OTUs in depth 0-20 cm, 69.04 % in depth 21-40 cm and 48.45 % in depth 41-60 cm. The results revealed high levels of obligate arbuscular mycorrhiza fungi that if commercially cultured could enhance phosphates uptake in crops.

Keywords: Fungi diversity, Rhizosphere, *Aspilia pruliseta*, OTUs, DNA

53

## Introduction

54 Microorganisms were used in early civilizations for agricultural and industrial processes long  
55 before they were well known and documented. Recent advancements in understanding about the  
56 genetics, physiology, and biochemistry of fungi, has led to the exploitation of fungi for different  
57 purposes in agriculture and industrial products of economic importance. Application of chemical  
58 fertilizers to crop plants negatively affects human health and environments (1) . Beneficial plant-  
59 microbes interactions in the rhizosphere are determinants of plant health and soil fertility (2).  
60 Recent studies have focused on identification of alternative methods to enhance plant productivity  
61 and protect the soil. This can only be possible with thorough knowledge and information of  
62 microbes along the plants' rhizosphere and fungal microbes is one category, that with this  
63 understanding, could provide the link and alleviate challenges posed by poor land productivity.

64

65 Arbuscular mycorrhizal fungi (AMF) are below ground symbiotic associations between plant roots  
66 and fungi (3). AMF can improve plant growth under low fertility conditions, improve water  
67 balance of the plants and help plants to establish in new areas (4). These beneficial effects imply  
68 that the plant community structure and productivity in ecosystems are influenced significantly by  
69 the AM fungal diversity in the soil (5). However, the genetic diversity of fungi and other microbes  
70 in the plants' rhizosphere is not yet fully comprehended (1).

71

72 Fungi dominate in low pH or slightly acidic soils where soils tend to be undisturbed (6). A good  
73 undisturbed ecological niche would be a plants' rhizosphere. Over 80% of vascular or non-vascular  
74 terrestrial plants form symbiotic mycorrhizae fungi relationships along the rhizosphere by forming  
75 hyphae networks (7). Through mycorrhizae the plant obtains mainly phosphate and other minerals,  
76 such as zinc and copper, from the soil. The fungus obtains nutrients, such as sugars, from the plant

77 root. Mycorrhiza fungi interdependence with roots of the higher plants is not only beneficial to the  
78 host plant but also play a role in the aggradative process of soil structure formation (8).  
79 Furthermore, a well diversified rhizosphere fungal community is thought to play a role in the  
80 suppression of pathogens (9) and (10). Knowledge of the structure and diversity of the fungal  
81 community in the rhizosphere will lead to a better understanding of pathogen-antagonist  
82 interactions (10).  
83 Most past plant rhizosphere mycological studies have concentrated on cultivated crops (11) (12)  
84 and (13). This has left a gap in understanding fungal diversity preexisting before planting field crops. In  
85 this study, illumina sequencing molecular method was used to identify fungal species in the  
86 rhizosphere of *Aspilia pruliseta* Schweif. *Aspilia pruliseta* is a flowering plant in the asteraceae  
87 family and was hypothesized to grow in coexistence with the mycorrhiza fungi. It is hypothesized  
88 that this complex association leads to availability of phosphorus in the soils in usable forms to  
89 plants. The herbaceous plant is common and grows naturally in the open woodlands and grasslands  
90 in western, southern, central and eastern Africa. Farmers in central eastern Kenya have reported  
91 good crop yields, particularly cereals, in farms previously growing *Aspilia pruliseta*.

92

## 93 **MATERIALS AND METHODS**

### 94 **Study sites**

95 This study was carried out in the semi-arid eastern Kenya at Gakurungu, Tunyai and Kanyuambora  
96 with coordinates 00°21'00" S, 37°28'30" E, 00°10'00" S, 37°50'00" E and 00°12'00" S, 37°51'00"  
97 E respectively. Elevation for all the studied sites was below 1000 m above sea level. Rainfall in  
98 the selected areas was scanty and below 700 mm/year with two distinct, but unreliable wet seasons  
99 in the months of March to May and October to December. Dry spells were more prolonged with

100 temperature mean of 26<sup>0</sup>C. Natural trees and shrubs found in the area were *Aspilia pruliseta*,  
101 *Cassia sp*, *Euphorbia sp*, *Acasia sp* and *Balanites aegyptiaca*. *Cenchrus ciliaris* and *Hyperrhenia*  
102 *rufa* grasses were interspersed in trees and shrubs.

103

#### 104 **Measurements of physico-chemical information on soil rhizosphere depths in the study sites**

105 Physico-chemical analysis of the rhizosphere soil was done for factors that would influence fungal  
106 populations and distribution (Table 1a, b, c). Latitude and longitude of the sampling sites were  
107 taken using global positioning system (GARMIN eTrex 20). Soil pH for each rhizosphere depth  
108 was taken with a portable pH meter (Oakton pH 110, Eutech Instruments Pty. Ltd) and confirmed  
109 with indicator strips (Merck, range 5-10). *In situ* soil temperature was taken using an electrical  
110 chemical analyzer (Jenway – 3405). 10 g of the composite soil from every rhizosphere depth  
111 studied was analyzed in the laboratory for mycorrhiza fungi determination using (14) protocol.  
112 The same soil sample was analysed for soil phosphorus in ppm using (15) protocol. Soil moisture  
113 was determined using (16) method while soil nitrogen content was determined using (17) method.  
114 The samples was also analysed for soil phosphates using (18) protocol and organic matter content  
115 using the method by (19).

116

#### 117 **Sample collection**

118 Soils were sampled from Gakūrūngū, Tunyai and Kanyuambora field sites using a standard soil  
119 auger (SOD-GP Dormer sampling equipment). A reconnaissance survey was initially carried out  
120 in which natural seed-bearing *Aspilia pruliseta* plots were mapped out. Besides the seed bearing

121 vegetation of interest, the selected areas of the survey for each of the three sites had to have three  
122 soil textural types (sandy loam, silt loam and silty clay). In each site, a quadrant measuring one  
123 metre by one metre was thrown at random in each sub-site (a sub-site consisted of an area within  
124 the site with one soil textural type). In case the quadrant contained more than one *Aspilia pruliseta*  
125 plant, the one closest to the centre of the quadrant was chosen for collection of rhizosphere soil  
126 fungal spores. The quadrant was thrown five times in each sub-site and soil was sampled at depth<sub>1</sub>,  
127 0-20 cm; depth<sub>2</sub>, 21-40 cm, depth<sub>3</sub>, 41-60 cm using a soil auger with a scooping capacity of 40cm<sup>3</sup>  
128 of soil. The sampled soil was put together for each rhizosphere depth from each sub-site and  
129 homogenously mixed. 100 g of the mixture was put into khaki paper bags for soil and root DNA  
130 analysis in the laboratory.

131

### 132 **Soil and rootlets total DNA extraction**

133 10 g of composite soil from the rhizosphere of *Aspilia pruliseta* comprising of the plant's rootlets  
134 was weighed using an electronic balance. The weighed soil was put into 100 ml beaker and about  
135 50 ml tap water was added. The mixture was placed and mixed on an electronic stirrer overnight.  
136 After 12 hours the mixture was washed several times by passing it through a 710  $\mu$  sieve placed  
137 on top of a 45  $\mu$  sieve (14). The 710  $\mu$  sieve collected the roots and coarse debris while the 45  $\mu$   
138 prevented the spores from passing through. The roots and coarse debris from the 710  $\mu$  sieve were  
139 put into a mortar and air-dried in a hood while the process of sieving continued by collecting sieved  
140 water and soil mixture in a 1-litre cylinder (14) . The washing and decanting process was done  
141 several times until near-clear water was obtained. This was followed by filling the centrifuge tubes  
142 with the sieved content. Centrifugation was done for 5 minutes at 1500 revolutions per minute  
143 (rpm) and the filtrate was poured off while the supernatant remained at the bottom of the tube. 48

144 % sucrose solution was added to the supernatant at equal volumes (50ml) and centrifuged for 1  
145 minute at 1500 (rpm) (14). The filtrate was collected on the 45  $\mu$  sieve while the supernatant was  
146 disposed off. The filtrate was then washed with slowly flowing tap water to wash off the sucrose.  
147 The washed content was then collected in a 50ml plastic cylinder and the contents poured into a  
148 filter paper. Using a fine pair of forceps, the contents were picked and transferred to eppendorf  
149 tubes. The dried plant roots in the mortar were crushed into a fine powder using a pestle and the  
150 contents added to fungal spore cells in the eppendorf (20) . The content in the eppendorf was re-  
151 suspended in 100  $\mu$ l of solution A {100mM Tris-HCL (pH 8.0), 100Mm EDTA (pH 8.0); added  
152 to 5  $\mu$ l of lysozyme (from a 20mg/ml solution) and incubated at 37<sup>0</sup>C for 30 minutes in a water  
153 bath}. 400  $\mu$ l of lysis buffer (solution B) comprising 400 mM Tris-HCL (pH 8.0), 60 mM EDTA  
154 (pH 8.0), 150 mM NaCl, 1% sodium dodecyl sulfate and the tube was left at room temperature for  
155 10 minutes. 10  $\mu$ l of Proteinase K (20mg/ml) was mixed gently and incubated at 65<sup>0</sup>C for 1 hour  
156 in a water bath. An equal volume of chloroform/ isoamyl alcohol was added and centrifuged at  
157 13200 rpm for 5 minutes at 4<sup>0</sup>C. The supernatant was transferred to new tubes. In the new tubes,  
158 150  $\mu$ l of sodium acetate (pH 5.2) and an equal volume of isopropanol alcohol was added  
159 accordingly. The tubes were briefly mixed through inversion. The mixture was then incubated at  
160 -20<sup>0</sup>C overnight. The tubes were then spun at 13200 rpm for 30 minutes and the supernatant was  
161 discarded. The resultant DNA pellets were washed in 300  $\mu$ l of 70% ethanol. The pellets were then  
162 spun at 10000 rpm for 1 minute and the supernatant discarded. The resultant DNA pellet was air  
163 dried in the hood and dissolved in 50 ml of 13 Tris-EDTA. Genomic DNA (5–15 ng) in 10  $\mu$ l of  
164 ddH<sub>2</sub>O was used for RAPD amplification using 1.5% agarose gels and images obtained  
165 confirming presence of DNA (20). 6 samples (3 samples each from depth<sub>1</sub>, 0-20 cm; depth<sub>2</sub>, 21-  
166 40 cm and depth<sub>3</sub>, 41-60 cm) were dried using LABCONCO machine. About 30  $\mu$ l of the

167 confirmed DNA was shipped to mrdnalabs (USA) for next generation sequencing with the primers  
168 as diversity assay bTEFAP® average inhouse ITSwanda. Illumina was used as the sequencing  
169 technology method.

170

### 171 **Amplicon library preparation and sequencing**

172 Amplification of the ITS region on PCR was done using ITS1 (TCCGTAGGTGAACCTGCGG)  
173 and TS4 (TCCTCCGCTTATTGATATGC) primers with barcode according to (21). Amplification  
174 proceeded in a 30 cycle PCR using the HotStarTaq Plus Master Mix Kit (Qiagen, USA) with initial  
175 heating at 94°C for 3 min, followed by 28 cycles of denaturation at 94°C for 30 s, annealing at  
176 53°C for 40 s and extension at 72°C for 1 min, after which a final elongation step at 72°C for 5  
177 min was performed. Polymerase chain reaction (PCR) products were visualized on 2% agarose gel  
178 to determine the success of amplification and the relative intensity of bands. Multiple samples  
179 were pooled together in equal proportions based on their DNA concentrations. Pooled samples  
180 were purified using calibrated Ampure XP beads (Agencourt Bioscience Corporation, MA, USA).  
181 The pooled and purified PCR product was used to prepare DNA library according to Illumina  
182 sequencing protocol (22). Sequencing was performed at Molecular Research DNA  
183 (www.mrdnalab.com, Shallowater, TX, USA) on a MiSeq platform following the guidelines of  
184 the manufacturer.

185

### 186 **Sequence analysis, taxonomic classification and data Submission**

187 Sequences obtained from the Illumina sequencing platform were depleted of barcodes and primers  
188 using a proprietary pipeline (www.mrdnalab.com, MR DNA, Shallowater, TX) developed at the



189 service provider's laboratory. Low quality sequences were identified by denoising and filtered out  
190 of the dataset according to (23). Sequences which were < 200 base pairs after phred20- based  
191 quality trimming, sequences with ambiguous base calls, and those with homopolymer runs  
192 exceeding 6bp were removed. Sequences were analyzed by a script optimized for high-throughput  
193 data to identify potential chimeras in the sequence files, and all definite chimeras were depleted as  
194 previously described (24). De novo OTU clustering was done with standard UCLUST method  
195 using the default settings as implemented in QIIME pipeline Version 1.8.0 at 97% similarity level  
196 (25) . Taxonomy was assigned to each OTU using BLASTn against SILVA SSU Reference 119  
197 database at default e-value threshold of 0.001 in QIIME (26).

198

#### 199 **Data analysis**

200 Shannon, Simpson and Evenness diversity indices were used for each sample and were calculated  
201 using vegan package version 1.16-32 in R software version 4.0.2 (27). Community and  
202 Environmental distances were compared using Analysis of similarity (ANOSIM) test, based upon  
203 Bray-Curtis distance measurements with 999 permutations. Significance was determined at 95%  
204 confidence interval ( $p < 0.05$ ). Calculation of Bray-Curtis dissimilarities between datasets and  
205 hierarchical clustering were carried out using the R programming language (27) and the Vegan  
206 package (28) . To support OTU-based analysis, taxonomic groups were derived from the number  
207 of reads assigned to each taxon at all ranks from domain to genus using the taxa\_summary.txt  
208 output from QIIME pipeline Version 1.8.0. Obtained sequences were submitted to NCBI Sequence  
209 Read Archive with SRP# Study accessions: SRP061806.

210

211

## 212 Results

213 Soil pH for the three studied depths was slightly acidic with a range from 5.9-6.1 (Table 1a, 1b &  
 214 1c). The middle depth (21-40 cm, Table 1b) was more acidic with a pH of 5.9 compared to 6.1 and  
 215 6.0 in the first and third soil depth respectively. There was more organic matter content in depth  
 216 two at 9.1% compared to 8.8% and 8.6% for depth one and depth three respectively. Soil  
 217 temperatures declined with increasing rhizosphere depth from 25.5<sup>0</sup>C in depth one to 25.4<sup>0</sup>C and  
 218 25.2<sup>0</sup>C in depth two and three respectively. Mycorrhiza fungi (MF) spore counts along the  
 219 rhizosphere of *Aspilia pruliseta* plant had an inverse relationship to soil depth with the top soil,  
 220 depth one having 624 spores per 10g of the sample soil tested compared to 325.3 spores in depth  
 221 two and 199.1 spores in depth three.

222 Table 1 (a). Soil rhizosphere depth<sub>1</sub> (0-20 cm) physico-chemical parameters in sampling sites

| SITE CODE               | pH  | MF Counts /10 g soil sample | P <sub>2</sub> O <sub>4</sub> (ppm) | SM % | N%   | P (ppm) | OM%   | Soil Temp <sup>0</sup> C |
|-------------------------|-----|-----------------------------|-------------------------------------|------|------|---------|-------|--------------------------|
| SG1d1                   | 6.4 | 720                         | 48.09                               | 2    | 0.17 | 21      | 5.96  | 25.8                     |
| LG1d1                   | 5.9 | 960                         | 57.25                               | 3.7  | 0.04 | 25      | 6.9   | 25.5                     |
| CG1d1                   | 6   | 640                         | 120.21                              | 2.3  | 0.15 | 52.5    | 10.84 | 25.4                     |
| ST1d1                   | 6.2 | 688                         | 41.22                               | 2.97 | 0.15 | 18      | 8.62  | 25.7                     |
| LT1d1                   | 6.3 | 368                         | 177.48                              | 3.86 | 0.22 | 77.5    | 12.37 | 25.4                     |
| CT1d1                   | 6.7 | 640                         | 65.07                               | 5    | 0.11 | 20.5    | 13.22 | 25.3                     |
| SK1d1                   | 6.1 | 592                         | 89.31                               | 1.3  | 0.15 | 39      | 6.12  | 25.5                     |
| LK1d1                   | 5.7 | 592                         | 81.3                                | 2.17 | 0.15 | 35.5    | 8.05  | 25.3                     |
| CK1d1                   | 5.9 | 416                         | 76.72                               | 1.3  | 0.15 | 33.5    | 7.19  | 25.4                     |
| Average, d <sub>1</sub> | 6.1 | 624                         | 84.1                                | 2.7  | 0.1  | 35.8    | 8.8   | 25.5                     |

223 **Legend:** SG1-Sandy loam soil with *Aspilia pruliseta* vegetation at Gakurungu site; LG1-Silt loam  
 224 soil with *Aspilia pruliseta* vegetation at Gakurungu site; CG1-Silty clay soil with *Aspilia pruliseta*  
 225 vegetation at Gakurungu site; ST1- Sandy loam soil with *Aspilia pruliseta* vegetation at Tunyai  
 226 site; LT1-Silt loam soil with *Aspilia pruliseta* vegetation at Tunyai site; CT1- Silty clay soil with  
 227 *Aspilia pruliseta* vegetation at Tunyai site; SK1- Sandy loam soil with *Aspilia pruliseta* vegetation  
 228 at Kanyuambora site; LK1- Silt loam soil with *Aspilia pruliseta* vegetation at Kanyuambora site;  
 229 CK1- Silty clay soil with *Aspilia pruliseta* vegetation at Kanyuambora site; d<sub>1</sub>-Depth one (0-20

230 cm); MF-Mycorrhiza fungi; P<sub>2</sub>O<sub>5</sub>-Soil phosphates; SM-Soil moisture; N-Nitrogen; P-Phosphorus;  
 231 OM-Soil organic matter

232 Table 1(b). Soil rhizosphere depth<sub>2</sub> (21-40 cm) physico-chemical parameters in sampling sites

| SITE CODE  | pH  | MF Counts /10 g soil sample | P <sub>2</sub> O <sub>4</sub> (ppm) | SM % | N%   | P (ppm) | OM%   | Soil Temp0C |
|------------|-----|-----------------------------|-------------------------------------|------|------|---------|-------|-------------|
| SG1d2      | 6.7 | 160                         | 25.19                               | 1.8  | 0.2  | 11      | 6.15  | 25.6        |
| LG1d2      | 5.7 | 176                         | 65.27                               | 3.48 | 0.1  | 28.5    | 3.34  | 25.4        |
| CG1d2      | 5   | 640                         | 25.19                               | 2.09 | 0.12 | 11      | 9.89  | 25.3        |
| ST1d2      | 5.7 | 336                         | 80.15                               | 3.18 | 0.13 | 35      | 10.36 | 25.5        |
| LT1d2      | 5.8 | 280                         | 64.12                               | 3.66 | 0.14 | 28      | 12.91 | 25.3        |
| CT1d2      | 7.4 | 296                         | 80.15                               | 5.41 | 0.07 | 35      | 12.53 | 25.1        |
| SK1d2      | 6.1 | 336                         | 61.83                               | 2.09 | 0.18 | 27      | 9.42  | 25.4        |
| LK1d2      | 4.7 | 320                         | 208.39                              | 2.78 | 0.01 | 91      | 7.66  | 25.3        |
| CK1d2      | 5.8 | 384                         | 46.95                               | 1.39 | 0.11 | 20.5    | 9.84  | 25.3        |
| Average d2 | 5.9 | 325.3                       | 73                                  | 2.8  | 0.1  | 31.9    | 9.1   | 25.4        |

233 **Legend:** SG1-Sandy loam soil with *Aspilia pruliseta* vegetation at Gakurungu site; LG1-Silt loam  
 234 soil with *Aspilia pruliseta* vegetation at Gakurungu site; CG1-Silty clay soil with *Aspilia pruliseta*  
 235 vegetation at Gakurungu site; ST1- Sandy loam soil with *Aspilia pruliseta* vegetation at Tunyai  
 236 site; LT1-Silt loam soil with *Aspilia pruliseta* vegetation at Tunyai site; CT1- Silty clay soil with  
 237 *Aspilia pruliseta* vegetation at Tunyai site; SK1- Sandy loam soil with *Aspilia pruliseta* vegetation  
 238 at Kanyuambora site; LK1- Silt loam soil with *Aspilia pruliseta* vegetation at Kanyuambora site;  
 239 CK1- Silty clay soil with *Aspilia pruliseta* vegetation at Kanyuambora site; d<sub>2</sub>-Depth two (21-40  
 240 cm); MF-Mycorrhiza fungi; P<sub>2</sub>O<sub>5</sub>-Soil phosphates; SM-Soil moisture; N-Nitrogen; P-Phosphorus;  
 241 OM-Soil organic matter

242

243 Table 1(c). Soil rhizosphere depth<sub>2</sub> (41-60 cm) physico-chemical parameters in sampling sites

| SITE CODE | pH  | MF Counts /10 g soil sample | P <sub>2</sub> O <sub>4</sub> (ppm) | SM % | N%   | P (ppm) | OM%  | Soil Temp0C |
|-----------|-----|-----------------------------|-------------------------------------|------|------|---------|------|-------------|
| SG1d3     | 6.6 | 224                         | 53.82                               | 1.85 | 0.24 | 23.5    | 6.51 | 25.5        |
| LG1d3     | 6   | 208                         | 50.38                               | 2.57 | 0.14 | 22      | 5.24 | 25.3        |
| CG1d3     | 5   | 384                         | 246.75                              | 1.69 | 0.12 | 10.15   | 7.22 | 25.1        |
| ST1d3     | 5.6 | 144                         | 73.28                               | 2.89 | 0.09 | 32      | 6.99 | 25.4        |

|             |     |       |       |      |      |      |       |      |
|-------------|-----|-------|-------|------|------|------|-------|------|
| LT1d3       | 5.9 | 200   | 95.04 | 4.76 | 0.04 | 41.5 | 15.82 | 25.2 |
| CT1d3       | 8   | 160   | 44.66 | 5.25 | 0.05 | 19.5 | 12.58 | 25.0 |
| SK1d3       | 6.6 | 184   | 90.46 | 1.3  | 0.04 | 39.5 | 7.17  | 25.3 |
| LK1d3       | 5.4 | 208   | 19.47 | 3.06 | 0.1  | 8.5  | 7.52  | 25.2 |
| CK1d3       | 4.8 | 80    | 81.3  | 1.89 | 0.13 | 35.5 | 8.1   | 25.1 |
| Average, d3 | 6   | 199.1 | 83.9  | 2.8  | 0.1  | 25.8 | 8.6   | 25.2 |

244 **Legend:** SG1-Sandy loam soil with *Aspilia pruliseta* vegetation at Gakurungu site; LG1-Silt loam  
245 soil with *Aspilia pruliseta* vegetation at Gakurungu site; CG1-Silty clay soil with *Aspilia pruliseta*  
246 vegetation at Gakurungu site; ST1- Sandy loam soil with *Aspilia pruliseta* vegetation at Tunyai  
247 site; LT1-Silt loam soil with *Aspilia pruliseta* vegetation at Tunyai site; CT1- Silty clay soil with  
248 *Aspilia pruliseta* vegetation at Tunyai site; SK1- Sandy loam soil with *Aspilia pruliseta* vegetation  
249 at Kanyuambora site; LK1- Silt loam soil with *Aspilia pruliseta* vegetation at Kanyuambora site;  
250 CK1- Silty clay soil with *Aspilia pruliseta* vegetation at Kanyuambora site; d<sub>3</sub>-Depth three (41-60  
251 cm); MF-Mycorrhiza fungi; P<sub>2</sub>O<sub>5</sub>-Soil phosphates; SM-Soil moisture; N-Nitrogen; P-Phosphorus;  
252 OM-Soil organic matter

253

254

## 255 **Sequence data**

256 Raw data consisted of *Aspilia pruliseta* rhizosphere soil samples taken in depth one (0-20 cm),  
257 depth two (21-40 cm) and depth three (41-60 cm) consisting of 271582 sequences of which 175622  
258 were retained after removing sequences with different tags at each end for quality filtering and  
259 denoising. After removing singletons, chimeric sequences and OTUs of non-fungal organisms  
260 (<200 base pairs after phred20- based quality trimming, sequences with ambiguous base calls, and  
261 those with homopolymer runs exceeding 6 bp), a total of 373 OTUs were recovered at 3% genetic  
262 distance. 330 OTUs were of fungal origin and were further analysed.

263

## 264 **Diversity and Composition of fungal communities in the rhizosphere of *Aspilia pruliseta***

265 Based on BLASTn searches in SILVA SSU Reference 119 database, 323 fungal OTUs were  
266 identified, most of which had their best matches against accessions in SILVA database. These 324

267 OTUs spanned 5 phyla namely; Glomeromycota, Basidiomycota, Chytridiomycota, Ascomycota  
268 and unspecified phylum of fungi.

269 MC2<sub>a</sub> that consisted of rhizosphere soil depth of 21-40 cm had the highest overall number of OTUs  
270 (283 OTUs) while MC1<sub>a</sub> (0-20 cm) and MC3<sub>a</sub> (41-60 cm) had 262 and 265 overall OTUs  
271 respectively. 160 OTUs were shared among all sample types (Figure 1).

272 Fungal OTUs were distributed among the phyla as follows; Glomeromycota (90.7%),  
273 Basidiomycota (3.7%), Ascomycota (3.4%), Chytridiomycota (1.5%), and unspecified phylum  
274 fungi (0.7%). Fungal phylum Glomeromycota was more abundant in rhizosphere depth one (0-20  
275 cm) with 232 OTUs compared to depth two (21-40 cm) and depth three (41-60 cm) which had 229  
276 and 213 OTUs respectively. This phylum was represented by most genera as shown in figure 2.

277 The phylum Ascomycota had inverse OTU numbers to soil depth. At soil depth 0-20 cm, the  
278 phylum had 2 OTUs. The phylum had 5 and 9 OTUs at soil depth 21-40 cm and 41-60 cm  
279 respectively. Chytridiomycota and Basidiomycota fungal phylum had similar characteristics to  
280 Ascomycota and tended to inhabit the lower rhizosphere echelons. At 0-20 cm soil depth, OTUs  
281 were affiliated to the genus *Glomus* with a relative abundance of 85.3%, *Septoglomus* with 5.5%  
282 and *Paraglomus* with 4.9% whereas at 21-40 cm, the dominant genus was *Glomus* with relative  
283 abundance of 78.3% and *Rhizophagus* with a relative abundance of 15.8% while at soil depth 41-  
284 60 cm the dominant genus was *Glomus* with a relative abundance of 50.9% and *Septoglomus* with  
285 a relative abundance of 38.6% (Figure 2). The dominant species in the rhizosphere were *Glomus*  
286 *sp* and *Paraglomus laccatum*. The soil sample collected at soil depth 0-20 cm (MC1<sub>a</sub>) was found  
287 to harbor a higher diversity of fungi with low species richness as shown in Figure 2.

288 Hierarchical clustering between samples collected from the rhizosphere of *Aspilia pruliseta*  
289 revealed samples from the second and third studied soil levels (21-60 cm) to be closer than from

290 the sample in the first soil level, 0-20 cm (Figure 3). The dendrogram shows relationships between  
291 the three samples collected.

292

### 293 **Fungal richness and diversity indices**

294 Richness (S) estimated the rhizosphere depth MC3a (41-60 cm) to be the richest site, constituting  
295 62 taxa. Soil samples from the three sites had Evenness (J') scores close to 0.1(0.0457 – 0.0978),  
296 hence showing evenness in their number of taxa members than the soil sample (41-60 cm).  
297 Simpson (1/D) also indicated the soil sample taken from depth 21-40 cm (MC2a) to harbor the  
298 most diverse taxa (12.808). The Shannon's index ( $H' = 2.48-3.32$ ) indicated low variation in the  
299 level of diversity among the soil depth samples taken (Table 2).

300

301 Table 2. Diversity indices computed on all OTU-based fungal taxonomic units obtained from  
302 samples collected from the rhizosphere of *Aspilia pruliseta*

| Sample        | Sequences after filtering | No. of OTUs | Richness (S) | Shannon (H) | Inverse Simpson (I/D) | Evenness (J) |
|---------------|---------------------------|-------------|--------------|-------------|-----------------------|--------------|
| MC1a          | 72,093                    | 283         | 42           | 2.484       | 4.836                 | 0.0457       |
| MC2a          | 50,539                    | 262         | 58           | 3.321       | 12.808                | 0.0978       |
| MC3a          | 43,596                    | 265         | 62           | 2.936       | 7.294                 | 0.0711       |
| <b>Totals</b> | <b>166,228</b>            | <b>323</b>  | <b>162</b>   |             |                       |              |

303

304

305 Analysis of similarity and distance based redundancy analysis at class (Figure 4) level showed  
306 connectivity of distance matrix with threshold dissimilarity of 1 indicating that data of the three  
307 samples are connected ([1] 1 1 1), hence there were no significant differences in community  
308 structure in the samples at 95% level of confidence (P value=0.05).

309

### 310 **Discussion**

311 Soil microbial community is responsible for most nutrient transformations in soil, regenerating  
312 minerals that limit plant productivity (29). Soil pH strongly influences fungal biomass composition  
313 (30). In this experiment, moderately acidic and sandy loam textured soils tended to favour  
314 proliferation of rhizosphere fungal growth (Table 1a, b &c). The level of soil organic matter was

315 higher in the second rhizosphere layer (21-40 cm) but fungal microbe population was not  
316 correspondingly high agreeing with the principal findings of (31) that soil has diverse elements  
317 that contribute to its productivity and the proper balance between those elements is what actually  
318 matters.

319 The high sensitivity of Illumina sequencing enabled detection of rare species, thus providing more  
320 detailed information on fungal diversity in the rhizosphere of *Aspilia pruliseta* plant. The phylum,  
321 *Glomeromycota* was more frequently identified in the plant's rhizosphere than those of  
322 *Basidiomycota* and *Ascomycota* whereas members of *Chytridiomycota* were represented on a  
323 smaller proportion of the rhizosphere fungal communities. The presence of unidentified fungal  
324 phylum indicate that new and potentially useful fungal communities do exist. Results from most  
325 rhizosphere mycological research findings indicate heavy presence of *Ascomycota* and  
326 *Basidiomycota* phyla (11) (12) and (13) from cultivated crops. From this research, there is a clear  
327 departure on the hierarchical fungal composition of the wild semi-arid shrub (*Aspilia pruliseta*)  
328 that could prove beneficial to follower-cultivated crops.

329

### 330 **Conclusion**

331 This study presented fungal diversity analysis of rhizosphere soil samples collected from *Aspilia*  
332 *pruliseta* in the semi-arid eastern Kenya using Illumina Sequencing Technology. The results  
333 revealed heavy presence of phosphate solubilizing fungi suggesting the usefulness of the shrub for  
334 use in improving fallows. Optimal physico-chemical properties for AMF proliferation include  
335 sandy loam soils at 0-20 cm rhizosphere depth, warm and moderately acidic. The phylum,  
336 *Glomeromycota* dominated the plant's rhizosphere depth.

### 337 **ACKNOWLEDGEMENT**

338 Authors acknowledge funding in carrying out this research by National Research Fund (NRF) from  
339 the Kenya government.

### 340 **REFERENCE**

- 341 1. Yuvaraj M, Ramasamy M. Role of Fungi in Agriculture. In 2020.
- 342 2. Anwar MS, Siddique MT, Verma A, Rao YR, Nailwal T, Ansari MW, et al. Multitrait  
343 plant growth promoting (PGP) rhizobacterial isolates from Brassica juncea rhizosphere:



- 344 Keratin degradation and growth promotion. *Commun Integr Biol.* 2014;7(1):37–41.
- 345 3. Shukla A, Kumar A, Jha A, Ajit, Rao DVKN. Phosphorus threshold for arbuscular  
346 mycorrhizal colonization of crops and tree seedlings. *Biol Fertil Soils.* 2012;48(1):109–16.
- 347 4. Shukla A, Kumar A, Jha A, Salunkhe O, Vyas D. Soil moisture levels affect  
348 mycorrhization during early stages of development of agroforestry plants. *Biol Fertil*  
349 *Soils.* 2013;49(5):545–54.
- 350 5. Van Der Heijden MGA, Klironomos JN, Ursic M, Moutoglis P, Streitwolf-Engel R,  
351 Boller T, et al. Mycorrhizal fungal diversity determines plant biodiversity, ecosystem  
352 variability and productivity. *Nature.* 1998;396(6706):69–72.
- 353 6. Sreenivasa MN, Bagyaraj DJ. Use of pesticides for mass production of vesicular-  
354 arbuscular mycorrhizal inoculum. *Plant Soil.* 1989;119(1):127–32.
- 355 7. Brundrett MC. Understanding the Roles of Multifunctional Mycorrhizal and Endophytic  
356 Fungi. *Microb Root Endophytes.* 2007;9:281–98.
- 357 8. Schreiner RP, Mihara KL, McDaniel H, Bethlenfalvay GJ. Mycorrhizal fungi influence  
358 plant and soil functions and interactions. *Plant Soil.* 1997;188(2):199–209.
- 359 9. Jarošík V, Kováčiková E, Maslowská H. The influence of planting location, plant growth  
360 stage and cultivars on microflora of winter wheat roots. *Microbiol Res.* 1996;151(2):177–  
361 82.
- 362 10. Smit E, Leeftang P, Glandorf B, Van Elsas JD, Wernars K. Analysis of fungal diversity in  
363 the wheat rhizosphere by sequencing of cloned PCR-amplified genes encoding 18S rRNA  
364 and temperature gradient gel electrophoresis. *Appl Environ Microbiol.* 1999;65(6):2614–  
365 21.
- 366 11. Zimudzi J, Waals JE Van Der, Coutinho TA, Cowan DA, Valverde A. Temporal shifts of



- 367 fungal communities in the rhizosphere and on tubers in potato fields Josephine. Fungal  
368 Biol [Internet]. 2018; Available from: <https://doi.org/10.1016/j.funbio.2018.05.008>
- 369 12. Jie W, Lin J, Guo N, Cai B, Yan X. Community composition of rhizosphere fungi as  
370 affected by Funneliformis mosseae in soybean continuous cropping soil during seedling  
371 period. 2019;79(September):356–65.
- 372 13. Floc J, Hamel C, Harker KN, St-arnaud M. Fungal Communities of the Canola  
373 Rhizosphere : Keystone Species and Substantial Between-Year Variation of the  
374 Rhizosphere Microbiome. 2020;
- 375 14. Varma A (1998). BLMS science and business media. [https://doi.org/10.1007/978-3-642-](https://doi.org/10.1007/978-3-642-60268-9)  
376 [60268-9](https://doi.org/10.1007/978-3-642-60268-9). Varma, A. (1998). Biology Lab Manual. Springer science and business media.  
377 ht. In Springer science and business media; 1998. Available from:  
378 <https://www2.dijon.inrae.fr/mychintec/Protocole/protoframe.html>
- 379 15. Olsen SR, Cole C V, Watandbe F, Dean L. Estimation of Available Phosphorus in Soil by  
380 Extraction with sodium Bicarbonate. J Chem Inf Model. 1954;53(9):1689–99.
- 381 16. Johnson A. Methods of measuring Soil Moisture in the Field. Geol Surv Water-Supply  
382 Pap 1619-U [Internet]. 1962;112(January 2007):11–32. Available from:  
383 <http://medcontent.metapress.com/index/A65RM03P4874243N.pdf>
- 384 17. Bremner JM. Determination of nitrogen in soil by the Kjeldahl method. J Agric Sci.  
385 1960;55(1):11–33.
- 386 18. Mildred SS. Colorimetric Determination of Phosphorus in Soils. Anal Chem.  
387 1942;23(10):1496–7.
- 388 19. Schulte EE, Hoskins B. Recommended Soil Organic Matter Tests. Recomm Soil Test  
389 Proced Northeast United States. 2009;63–74.

- 390 20. Lee SB, Milgroom MG, Taylor JW. A rapid, high yield mini-prep method for isolation of  
391 total genomic DNA from fungi. *Fungal Genet Rep.* 1988;35(1):23.
- 392 21. White TJ, Bruns T, Lee S, Taylor J. Amplification and Direct Sequencing of Fungal  
393 Ribosomal Rna Genes for Phylogenetics. *PCR Protoc.* 1990;(January):315–22.
- 394 22. Yu K, Zhang T. Metagenomic and metatranscriptomic analysis of microbial community  
395 structure and gene expression of activated sludge. *PLoS One.* 2012;7(5).
- 396 23. Reeder J, Knight R. Rapid denoising of pyrosequencing amplicon data: exploiting the  
397 rank-abundance distribution. *Nat Methods [Internet].* 2010;7(9):668–9. Available from:  
398 <http://www.ncbi.nlm.nih.gov/pmc/articles/PMC2945879/>
- 399 24. Gontcharova VEY, Sun1 Y, Wolcott2 RD, Dowd and SE. A Comparison of Bacterial  
400 Composition in Diabetic Ulcers and Contralateral Intact Skin. *Open Microbiol J.*  
401 2010;4(1):8–19.
- 402 25. J Gregory Caporaso, Justin Kuczynski, Jesse Stombaugh, Kyle Bittinger, Frederic D  
403 Bushman, Elizabeth K Costello, Noah Fierer, Antonio Gonzalez Peña, Julia K Goodrich,  
404 Jeffrey Gordon, Gavin A Huttenhower, Scott T Kelley, Dan Knights5, Jeremy E Koenig RE.  
405 QIIME allows analysis of high-throughput community sequencing data. *Nat Methods.*  
406 2010;7(5):1–12.
- 407 26. Quast C, Pruesse E, Yilmaz P, Gerken J, Schweer T, Yarza P, et al. The SILVA ribosomal  
408 RNA gene database project: Improved data processing and web-based tools. *Nucleic  
409 Acids Res.* 2013;41(D1):590–6.
- 410 27. Hothorn T, Everitt BS. - An Introduction to R. *A Handb Stat Anal using R.* 2020;2:32–55.
- 411 28. Oksanen J, Blanchet FG, Friendly M, Kindt R, Legendre P, Mcglinn D, et al. Package  
412 “vegan” Title Community Ecology Package. *Community Ecol Packag [Internet].*

- 413 2019;2(9):1–297. Available from: [https://cran.r-](https://cran.r-project.org/web/packages/vegan/vegan.pdf)  
414 [project.org/web/packages/vegan/vegan.pdf](https://cran.r-project.org/web/packages/vegan/vegan.pdf)
- 415 29. Rousk J, Brookes PC, Bååth E. Contrasting soil pH effects on fungal and bacterial growth  
416 suggest functional redundancy in carbon mineralization. *Appl Environ Microbiol.*  
417 2009;75(6):1589–96.
- 418 30. Fierer N, Jackson RB. The diversity and biogeography of soil bacterial communities. *Proc*  
419 *Natl Acad Sci U S A.* 2006;103(3):626–31.
- 420 31. Bhattarai B. Variation of Soil Microbial Population in Different Soil Horizons. *J*  
421 *Microbiol Exp.* 2015;2(2):75–8.

bioRxiv preprint doi: <https://doi.org/10.1101/2020.10.23.351908>; this version posted October 23, 2020. The copyright holder for this preprint (which was not certified by peer review) is the author/funder, who has granted bioRxiv a license to display the preprint in perpetuity. It is made available under aCC-BY 4.0 International license.

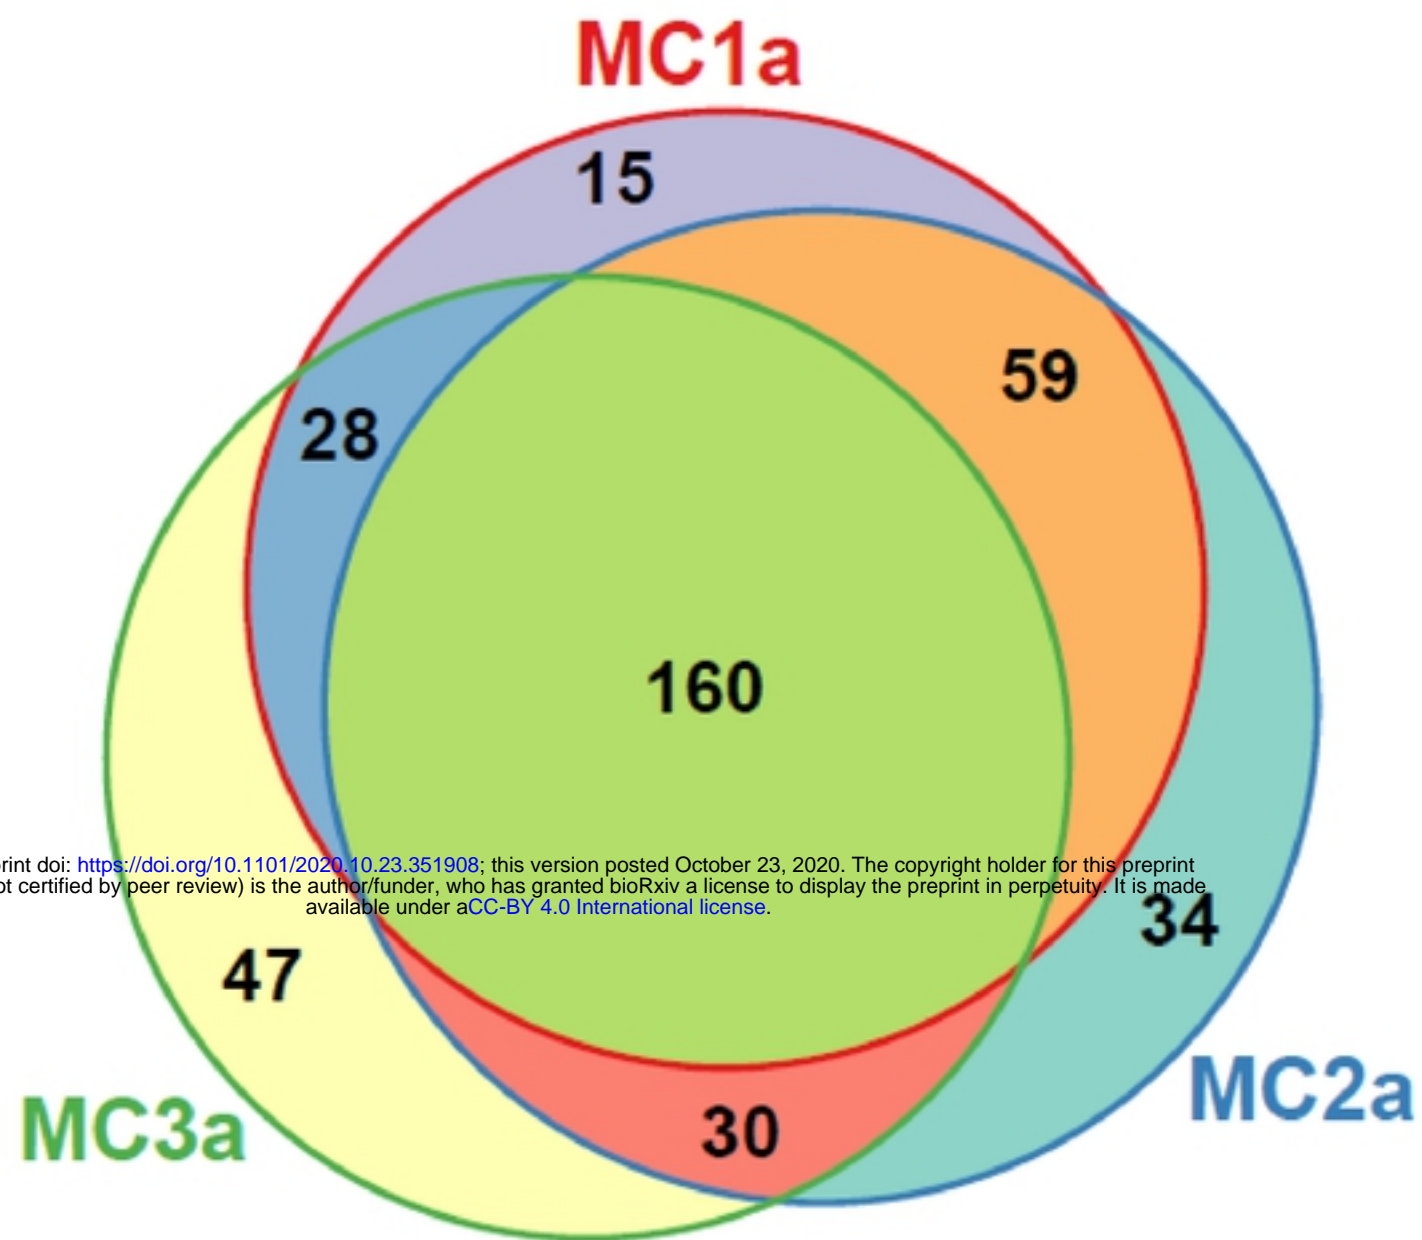

**Figure 1.** Venn diagram showing the distribution of unique and shared OTUs within various sample types in the three sampling sites. The number of OTUs in each rhizosphere depth is indicated in the respective circle.

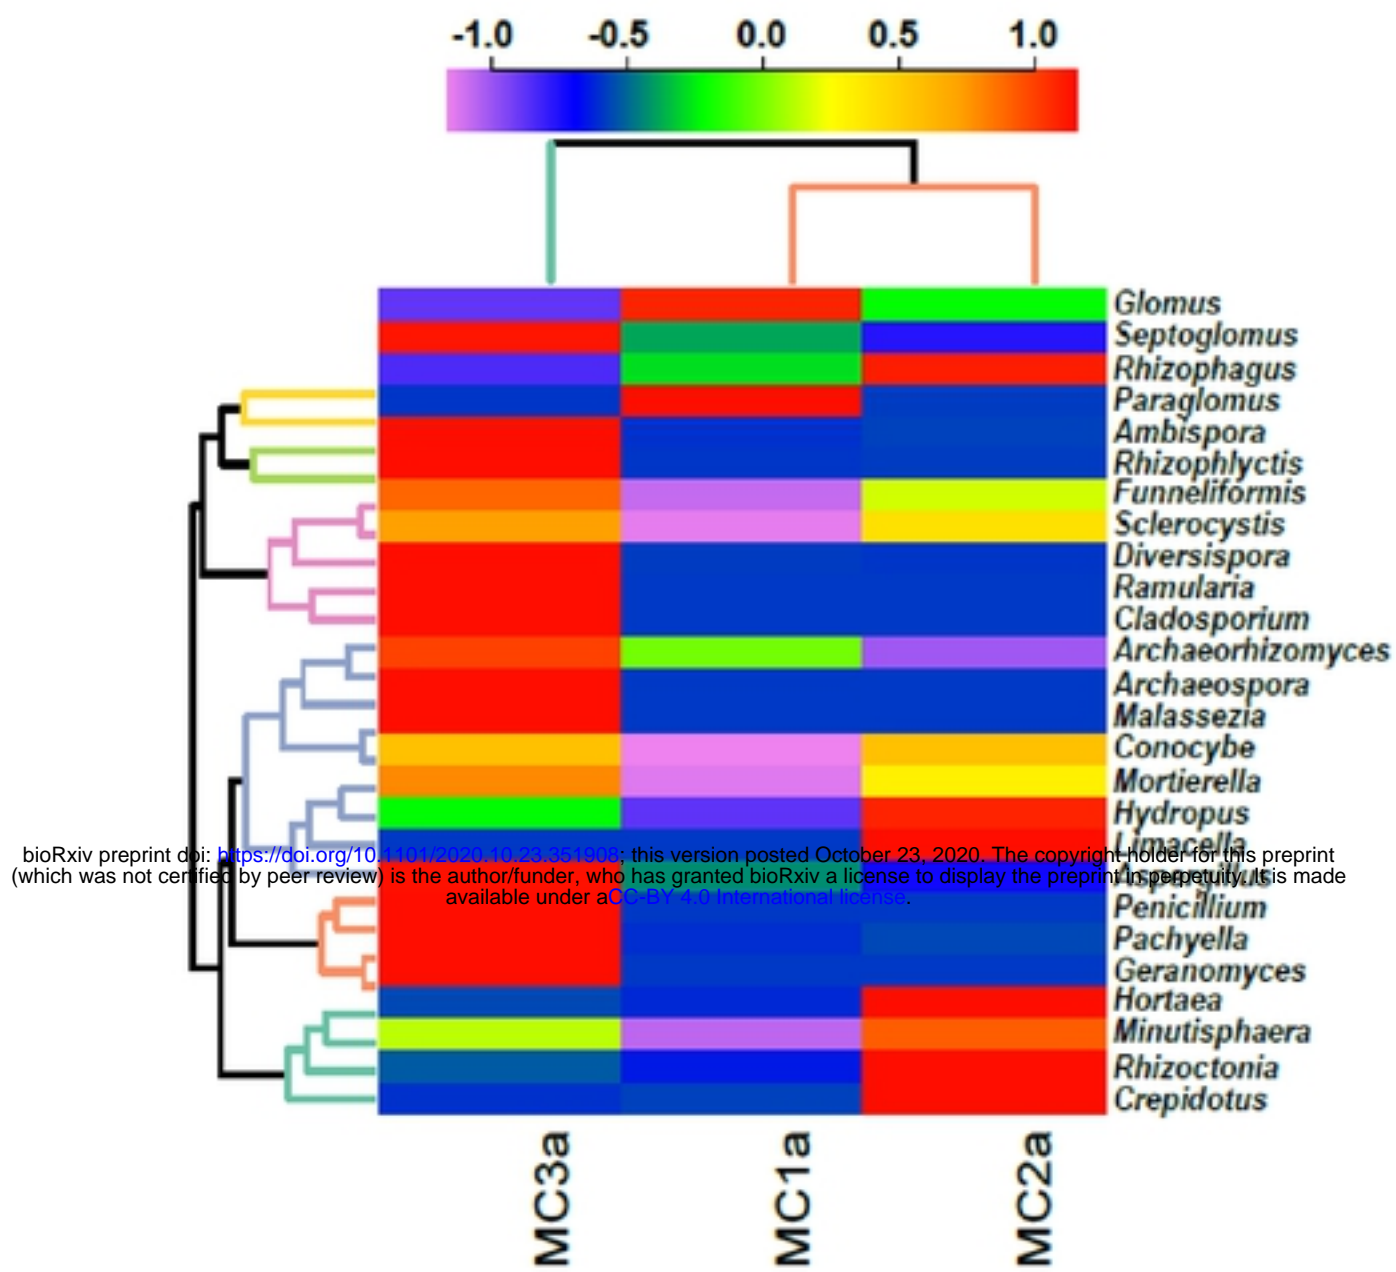

**Figure 2.** Heat map showing relative abundance of the most predominant fungal genera in various samples collected from *Aspilia pruliseta* rhizosphere.

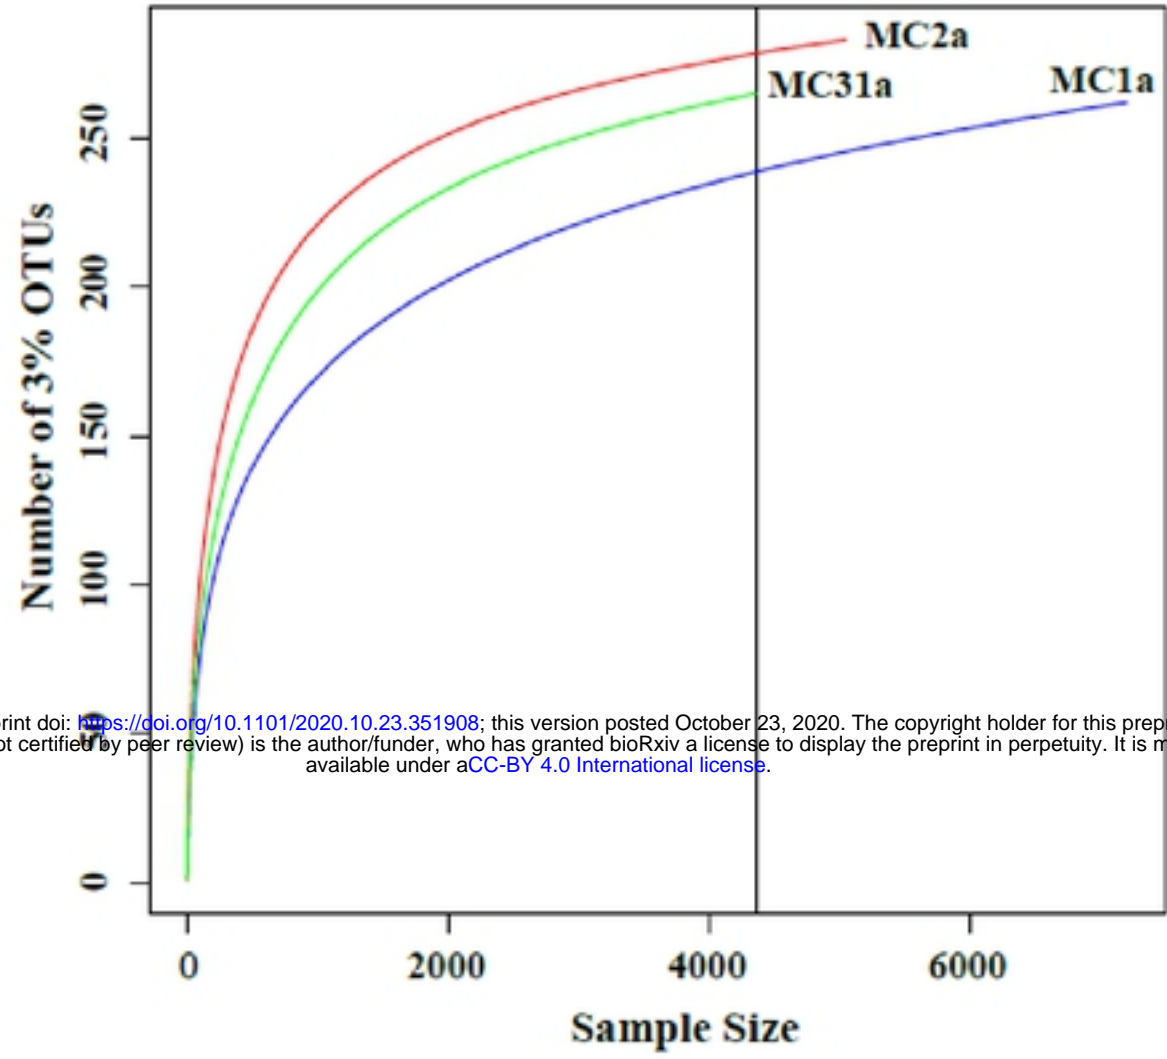

bioRxiv preprint doi: <https://doi.org/10.1101/2020.10.23.351908>; this version posted October 23, 2020. The copyright holder for this preprint (which was not certified by peer review) is the author/funder, who has granted bioRxiv a license to display the preprint in perpetuity. It is made available under aCC-BY 4.0 International license.

**Figure 3.** Relationships between the sample size sequenced and OTUs in the tested samples

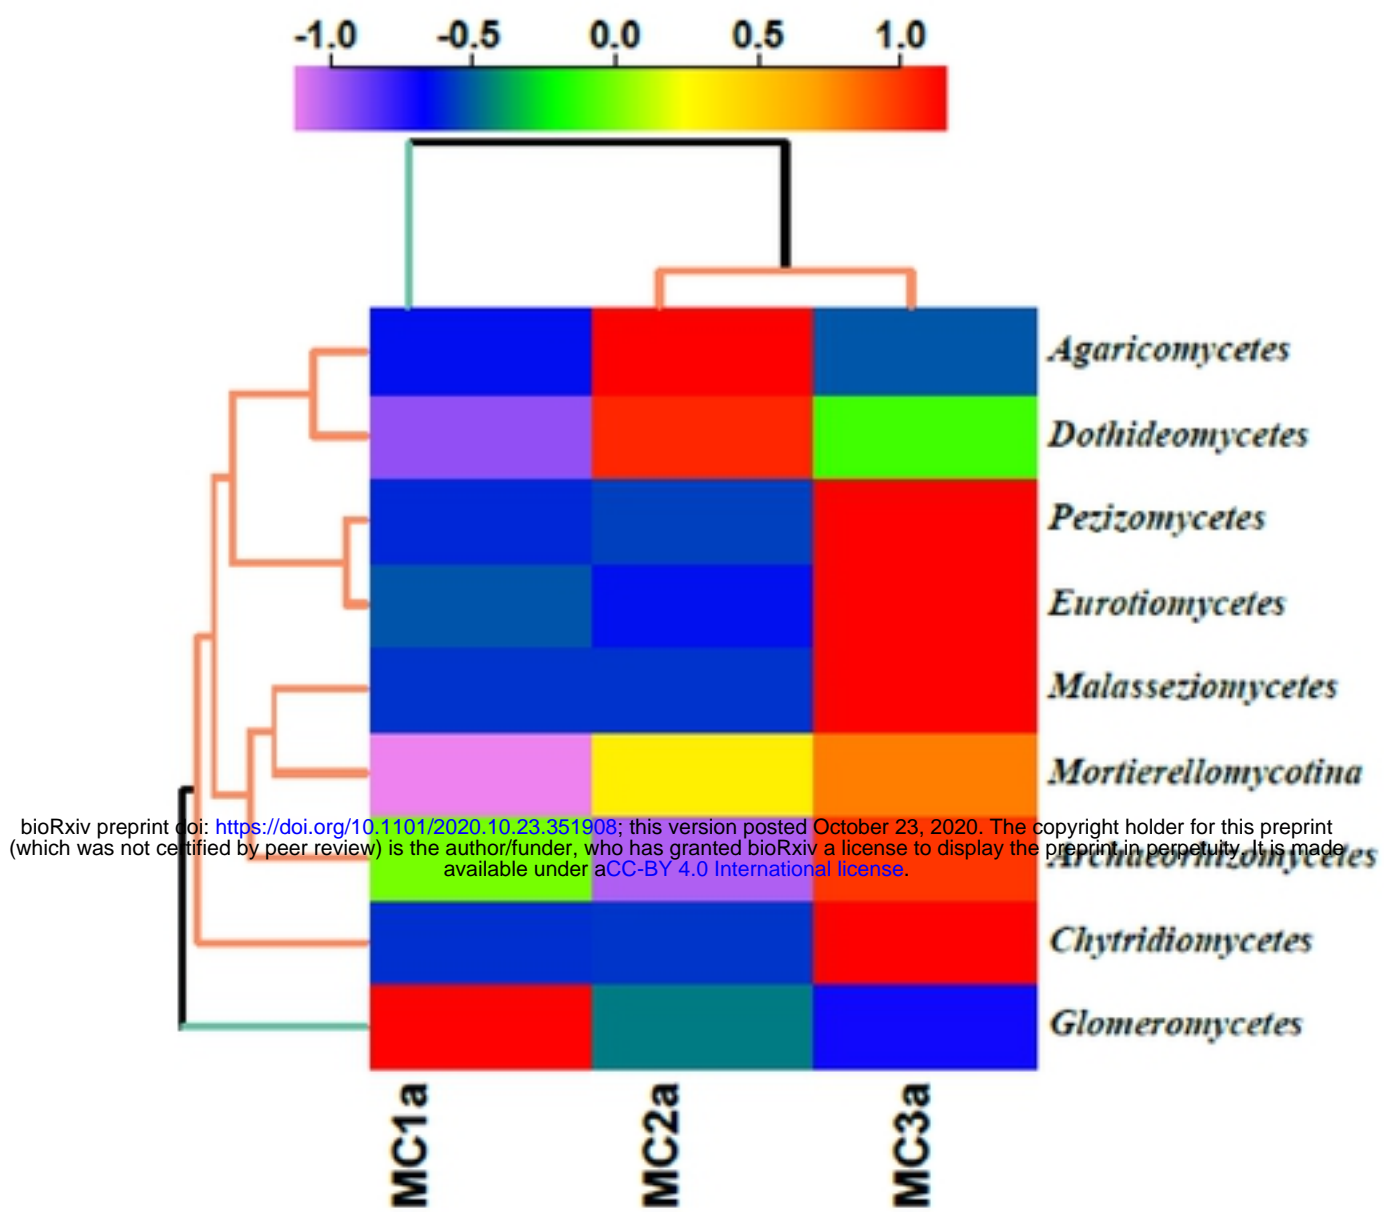

**Figure 4.** Hierarchical clustering of DNA samples collected from the studied soil rhizosphere depth. Class level was chosen to be used in hierarchical clustering to assess the relationships between samples and taxa.
